# Supplementary figures and images for: Spatial and single-cell colocalisation analysis reveals MDK-mediated immunosuppressive environment with regulatory T cells in colorectal carcinogenesis
Source: PubMed Central journal article supplement — eBioMedicine. 2024 Apr 12;103:105102. doi: 10.1016/j.ebiom.2024.105102 (PMC11121171; doi:10.1016/j.ebiom.2024.105102), 2024-04-12

RKO

MT-2

MDK

actin

SDC4

actin

siCTR  
siMDK

siCTR  
siMDK

siCTR  
siSDC4

siCTR  
siSDC4

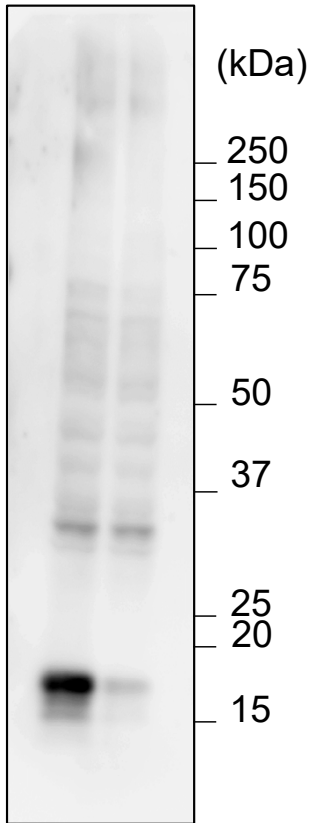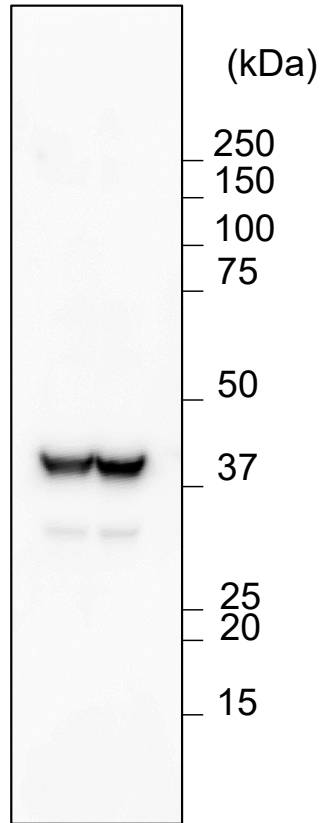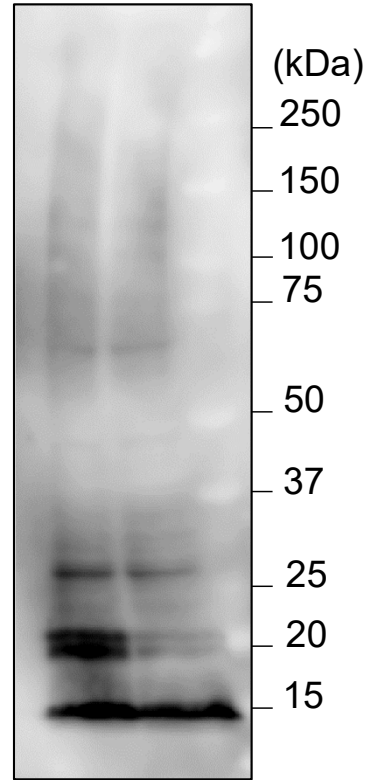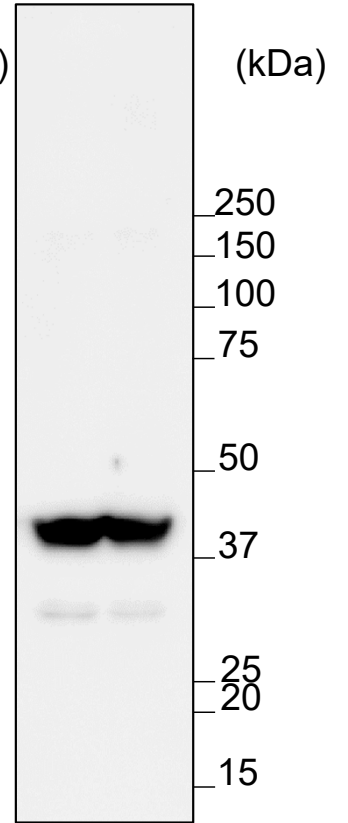

Supplement: mmc3.pdf [file mmc3.pdf]
